# Supplementary material for: Ocrelizumab efficacy in subgroups of patients with relapsing multiple sclerosis
Source: Springer Nature journal article supplement (doi:10.1007/s00415-019-09248-6), 2019-02-28
Supplement: MOESM1 [file 16516962]

## Supplementary Figures

**Supplementary Fig. S1** Subgroup analyses of disease progression confirmed at Week 24 by subgroup in the pooled OPERA I and OPERA II intent-to-treat population

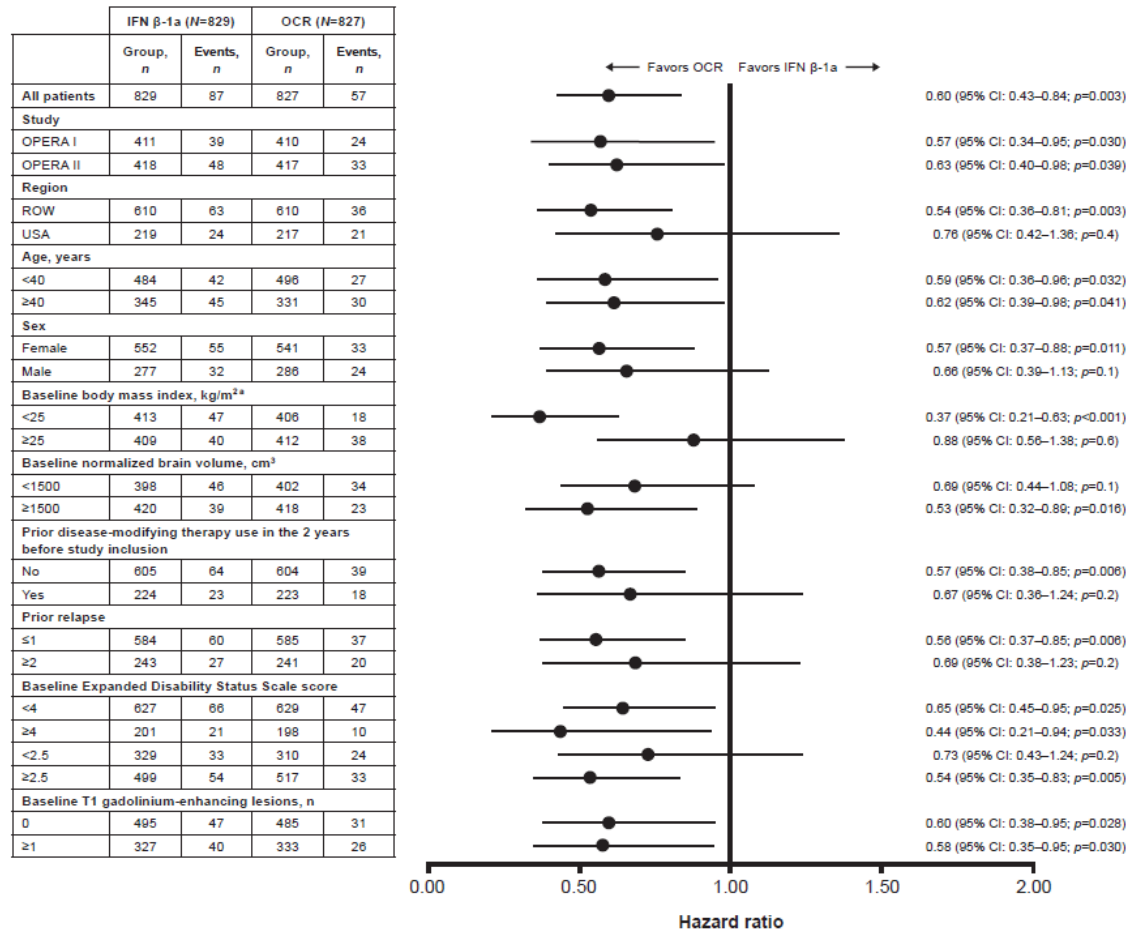

Subgroup level and treatment-by-subgroup interactions were assessed by the Cox proportional hazards method. *CI* confidence interval, *IFN* interferon, *OCR* ocrelizumab, *ROW* rest of world. <sup>a</sup>A significant treatment-by-subgroup interaction was observed for BMI (<25 years versus  $\geq$ 25 kg/m<sup>2</sup>;  $p=0.016$ );  $p$ -values <0.05 from the treatment-by-subgroup interaction test indicate that the treatment effect of OCR versus IFN is not the same at each subgroup level

**Supplementary Fig. S2** Subgroup analyses of the proportion of patients with NEDA rebaselined at Week 24 (NEDA24–96) in the pooled OPERA I and OPERA II mITT population

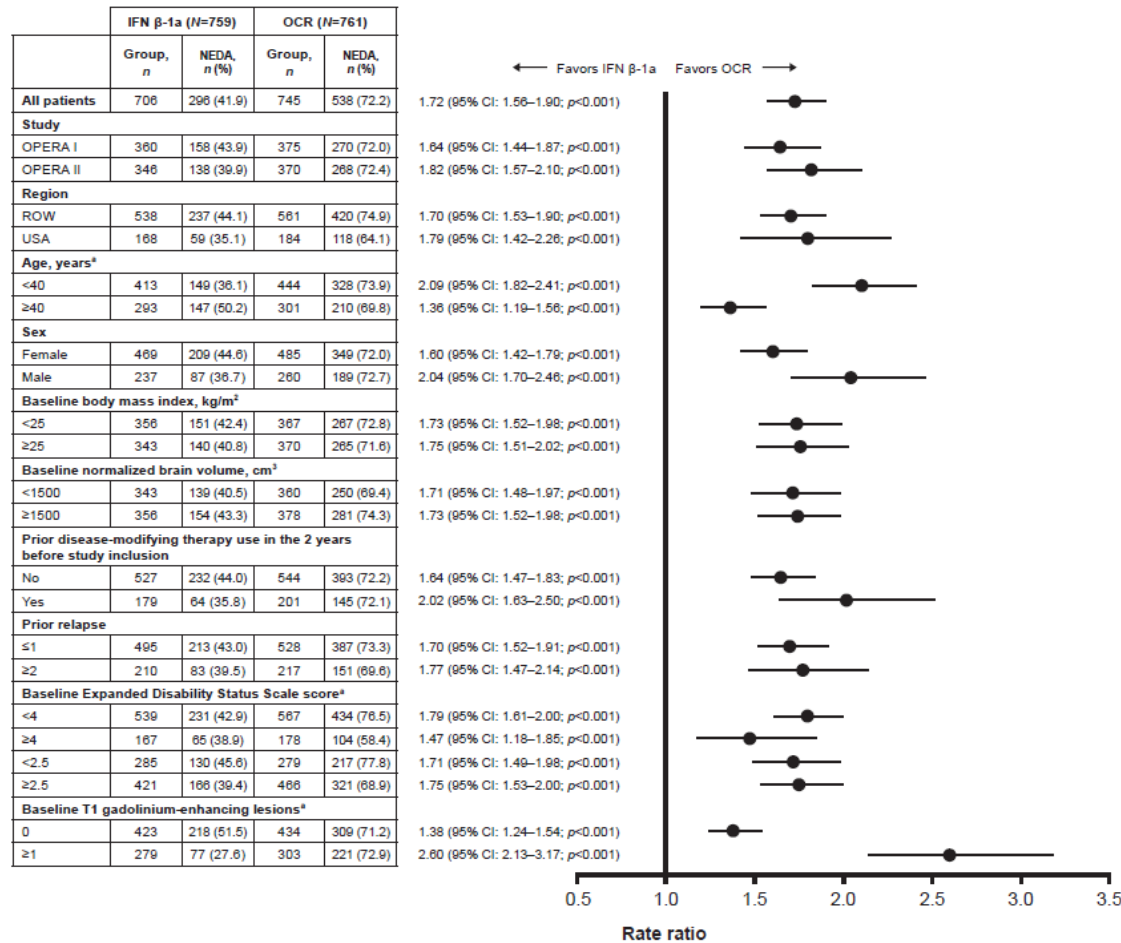

Subgroup level testing used the Cochran–Mantel–Haenszel test and treatment-by-subgroup interactions were assessed by the Breslow–Day test. *CI* confidence interval, *EDSS* Expanded Disability Status Scale, *IFN* interferon, *mITT* modified intent-to-treat, *NEDA* no evidence of disease activity, *OCR* ocrelizumab, *ROW* rest of world. <sup>a</sup>A significant treatment-by-subgroup interaction was observed for baseline EDSS score (<4.0 versus  $\geq 4.0$ ;  $p = 0.008$ ), age (<40 versus  $\geq 40$  years;  $p < 0.001$ ), and baseline T1 gadolinium-enhancing lesion status (0 versus  $\geq 1$ ;  $p < 0.001$ );  $p$ -values  $< 0.05$  from the treatment-by-subgroup interaction test indicate that the treatment effect of OCR versus IFN is not the same at each subgroup level

## Supplementary Tables

**Supplementary Table S1** Baseline demographics and disease characteristics  
(pooled OPERA I and OPERA II mITT patient population)

| <b>Characteristic</b>                                      | <b>IFN <math>\beta</math>-1a 44 <math>\mu</math>g<br/>(N=759)</b> | <b>Ocrelizumab 600 mg<br/>(N=761)</b> |
|------------------------------------------------------------|-------------------------------------------------------------------|---------------------------------------|
| <b>Age</b>                                                 |                                                                   |                                       |
| Years, mean (SD)                                           | 37.1 (9.2)                                                        | 37.2 (9.1)                            |
| <40 years, n (%)                                           | 447 (58.9)                                                        | 454 (59.7)                            |
| $\geq$ 40 years, n (%)                                     | 312 (41.1)                                                        | 307 (40.3)                            |
| <b>Female, n (%)</b>                                       | 507 (66.8)                                                        | 493 (64.8)                            |
| <b>Body mass index</b>                                     |                                                                   |                                       |
| Kg/m <sup>2</sup> , mean (SD)                              | 26.3 (6.1)                                                        | 26.2 (5.8)                            |
| <25 kg/m <sup>2</sup> , n (%)                              | 382 (50.8%)                                                       | 374 (49.7%)                           |
| $\geq$ 25 kg/m <sup>2</sup> , n (%)                        | 370 (49.2%)                                                       | 379 (50.3%)                           |
| <b>Time since MS symptom onset, mean (SD), years</b>       | 6.4 (6.1)                                                         | 6.6 (6.1)                             |
| <b>Time since RMS diagnosis, mean (SD), years</b>          | 3.9 (4.8)                                                         | 3.9 (4.9)                             |
| <b>No DMT in the 2 years before study inclusion, n (%)</b> | 558 (73.5)                                                        | 553 (72.7)                            |
| <b>EDSS score</b>                                          |                                                                   |                                       |
| Mean (SD)                                                  | 2.8 (1.3)                                                         | 2.8 (1.3)                             |
| <2.5, n (%)                                                | 306 (40.3)                                                        | 283 (37.2)                            |
| $\geq$ 2.5, n (%)                                          | 453 (59.7)                                                        | 478 (62.8)                            |

|                                                                 |                             |                             |
|-----------------------------------------------------------------|-----------------------------|-----------------------------|
| <4.0, n (%)                                                     | 579 (76.3)                  | 579 (76.1)                  |
| ≥4.0, n (%)                                                     | 180 (23.7)                  | 182 (23.9)                  |
| <b>Number of relapses</b>                                       |                             |                             |
| In the last year, mean (SD)                                     | 1.3 (0.7) <sup>a</sup>      | 1.3 (0.7)                   |
| In the last 2 years, mean (SD)                                  | 1.8 (0.9) <sup>a</sup>      | 1.8 (0.9) <sup>a</sup>      |
| ≤1 relapse in the last year, n (%)                              | 531 (70) <sup>a</sup>       | 537 (70.6) <sup>a</sup>     |
| ≥2 relapses in the last year, n (%)                             | 226 (29.8) <sup>a</sup>     | 224 (29.4)                  |
| <b>MRI</b>                                                      |                             |                             |
| Patients with no T1 gadolinium-enhancing lesions, n (%)         | 449 (59.7)                  | 441 (58.6)                  |
| Patients with ≥1 T1 gadolinium-enhancing lesion, n (%)          | 303 (40.3)                  | 312 (41.4)                  |
| Number of T2 hyperintense lesions, mean (SD)                    | 51.0 (37.5) <sup>b</sup>    | 50.0 (38.7) <sup>d</sup>    |
| T2 hyperintense lesion volume, cm <sup>3</sup> , median (range) | 6.2 (0–76.1) <sup>b</sup>   | 5.4 (0–96.0) <sup>d</sup>   |
| Normalized brain volume, cm <sup>3</sup> , mean (SD)            | 1,499.8 (88.3) <sup>c</sup> | 1,501.7 (88.1) <sup>b</sup> |
| Normalized brain volume <1500 cm <sup>3</sup> , n (%)           | 364 (48.6%)                 | 371 (49.2%)                 |
| Normalized brain volume ≥1500 cm <sup>3</sup> , n (%)           | 385 (51.4%)                 | 383 (50.8%)                 |

*DMT* disease-modifying therapy, *EDSS* Expanded Disability Status Scale, *IFN* interferon, *mITT* modified intent-to-treat, *MRI* magnetic resonance imaging, *MS* multiple sclerosis, *RMS* relapsing multiple sclerosis, *SD* standard deviation

<sup>a</sup>n=757. <sup>b</sup>n=754. <sup>c</sup>n=749. <sup>d</sup>n=75

**Supplementary Table S2** Endpoint and *p*-values from treatment-by-subgroup interaction tests

| Subgroup                            | Endpoint <i>p</i> -value <sup>a</sup> |         |         |                                 |                                          |                                         |        |                       |
|-------------------------------------|---------------------------------------|---------|---------|---------------------------------|------------------------------------------|-----------------------------------------|--------|-----------------------|
|                                     | ARR                                   | 12W-CDP | 24W-CDP | New /<br>enlarging T2<br>lesion | T1<br>gadolinium-<br>enhancing<br>lesion | Change from<br>baseline brain<br>volume | NEDA   | NEDA<br>(Weeks 24–96) |
| Study (OPERA I vs II)               | 0.9538                                | 0.7664  | 0.8072  | 0.1020                          | 0.8613                                   | 0.7464                                  | 0.3821 | 0.4055                |
| Region (ROW vs USA)                 | 0.7533                                | 0.2059  | 0.3212  | 0.5387                          | 0.6361                                   | 0.1028                                  | 0.4212 | 0.5994                |
| Age (<40 vs ≥40)                    | 0.0055                                | 0.8675  | 0.8454  | 0.2339                          | 0.0302                                   | 0.0608                                  | 0.3397 | 0.0006                |
| Sex (female vs male)                | 0.7323                                | 0.6031  | 0.6881  | 0.8494                          | 0.1352                                   | 0.1412                                  | 0.5034 | 0.1261                |
| BMI, kg/m <sup>2</sup> (<25 vs ≥25) | 0.8329                                | 0.0257  | 0.0163  | 0.0432                          | 0.8096                                   | 0.8460                                  | 0.6068 | 0.9662                |
| Prior DMT (yes vs no)               | 0.3824                                | 0.8685  | 0.5977  | 0.1735                          | 0.2287                                   | 0.9277                                  | 0.8671 | 0.1844                |
| Prior relapse (≤1 vs ≥2)            | 0.7087                                | 0.6292  | 0.5817  | 0.9661                          | 0.0567                                   | 0.8798                                  | 0.5480 | 0.8786                |
| Baseline EDSS                       |                                       |         |         |                                 |                                          |                                         |        |                       |

|                                                                    |        |        |        |        |        |        |        |         |
|--------------------------------------------------------------------|--------|--------|--------|--------|--------|--------|--------|---------|
| (<4.0 vs ≥4.0)                                                     | 0.1103 | 0.2324 | 0.4127 | 0.0068 | 0.1996 | 0.7496 | 0.0222 | 0.0079  |
| (<2.5 vs ≥2.5)                                                     | 0.3474 | 0.0932 | 0.4190 | 0.1655 | 0.3446 | 0.0866 | 0.4909 | 0.3820  |
| Baseline T1 gadolinium-enhancing lesion (0 vs ≥1)                  | 0.0009 | 0.9666 | 0.8945 | 0.3196 | 0.0012 | 0.9128 | 0.0673 | <0.0001 |
| Baseline normalized brain volume, cm <sup>3</sup> (<1500 vs ≥1500) | 0.5053 | 0.9139 | 0.4700 | 0.5802 | 0.3766 | 0.0023 | 0.6008 | 0.5619  |

12W-CDP disability progression confirmed at 12 weeks, 24W-CDP disability progression confirmed at 24 weeks, ARR annualized relapse rate, DMT disease-modifying therapy, EDSS Expanded Disability Status Scale, IFN interferon, NEDA no evidence of disease activity, OCR ocrelizumab, ROW rest of world

<sup>a</sup>P-values <0.05 from the treatment-by-subgroup interaction test indicate that the treatment effect of OCR versus IFN is not the same at each subgroup level
